1 **A novel and highly divergent Canine Distemper Virus lineage causing**  
2 **distemper in ferrets in Australia**

3

4 Running title: Canine Distemper Virus in Ferrets

5

6 Ankita M. George<sup>1,#</sup>, Michelle Wille<sup>1,2,3,\*#</sup>, Jianning Wang<sup>4</sup>, Keith Anderson<sup>5</sup>, Shari Cohen<sup>5</sup>,  
7 Jean Moselen<sup>1</sup>, Leo Yi Yang Lee<sup>1,3</sup>, Willy W. Suen<sup>4</sup>, John Bingham<sup>4</sup>, Antonia E Dalziel<sup>4</sup>,  
8 Aeron C. Hurt<sup>1</sup>, David T. Williams<sup>4</sup>, Yi-Mo Deng<sup>1</sup>, Ian G. Barr<sup>1,3\*</sup>

9

10 <sup>1</sup>WHO Collaborating Centre for Reference and Research on Influenza, at The Peter  
11 Doherty Institute for Infection and Immunity, Melbourne, Victoria, Australia

12 <sup>2</sup>Marie Bashir Institute for Infectious Diseases and Biosecurity, School of Life and  
13 Environmental Sciences and School of Medical Sciences, The University of Sydney,  
14 Sydney, New South Wales, Australia.

15 <sup>3</sup>Department of Microbiology and Immunology, at The Peter Doherty Institute for Infection  
16 and Immunity, The University of Melbourne, Melbourne, Victoria, Australia

17 <sup>4</sup>CSIRO, Australian Centre for Disease Preparedness, Geelong, Victoria, Australia.

18 <sup>5</sup>The Office of Research Ethics and Integrity, The University of Melbourne, Melbourne,  
19 Victoria, Australia.

20

21

22 \*Corresponding author: Michelle Wille [michelle.wille@sydney.edu.au](mailto:michelle.wille@sydney.edu.au); Ian Barr  
23 [ian.barr@influenzacentre.org](mailto:ian.barr@influenzacentre.org)

24 #These authors contributed equally.

25

26

## 27 **Abstract**

28 Canine distemper virus (CDV) is a highly contagious systemic viral disease of dogs, that  
29 regularly spills-over into other animal species. Despite widespread vaccination, CDV  
30 remains endemic in many parts of the world. In this study we report an outbreak of  
31 distemper in ferrets in two independent research facilities in Australia. We found that  
32 disease severity varied, although most animals had mild to moderate disease signs.  
33 Histopathology results of animals with severe disease presented the typical profile of  
34 distemper pathology with multi-system virus replication. Through the development of a  
35 discriminatory PCR paired with full genome sequencing we revealed that the outbreak at  
36 both facilities was caused by a single, novel lineage of CDV. This lineage was highly  
37 divergent across the H gene, F signal peptide and full genome and had less than 93%  
38 similarity across the H gene to other described lineages, including the vaccine strain.  
39 Molecular analysis indicates that this strain belongs to a distinct lineage that diverged from  
40 other clades approximately 140 to 400 years ago, and appears to be unique to Australia.  
41 Given the differences in key viral proteins of this novel CDV strain, a review of the efficacy  
42 of the CDV vaccines currently in use in Australia is warranted to ensure maximum  
43 protection of dogs and other vulnerable species. In addition, enhanced surveillance to  
44 determine the prevalence of CDV in ferrets, dogs and other at-risk species in Australia  
45 would be useful to better understand the diversity of CDV in Australia.

## 46 **Importance:**

47 Canine distemper virus (CDV) is highly contagious and while dogs are the main reservoir,  
48 it may spill over into a number of other animal species. In this study we report an outbreak  
49 of distemper in ferrets in two research facilities in Australia. Outcomes of pathology and  
50 histopathology suggest ferrets have widespread multi-systemic infection, consistent with  
51 previously reported distemper infections in ferrets and dogs. Critically, through sequencing  
52 and phylogenetic analysis, we revealed that the outbreak at both facilities was caused by a  
53 single, novel and highly divergent lineage of CDV. This virus had less than 93% nucleotide  
54 similarity to other described lineages and the vaccine strain. This manuscript adds  
55 considerably to the epidemiology, ecology and evolution of this virus, and is one of few  
56 reports of distemper in Australia in the literature.

57

58 **Keywords:** Canine distemper virus, Canine morbillivirus, *Paramyxoviridae*, CDV, ferrets,  
59 Australia

## 60 Introduction

61 Canine distemper virus (CDV) (species *Canine morbillivirus*), is a member of the genus  
62 *Morbillivirus*, in the family *Paramyxoviridae* (1) and causes endemic and widespread  
63 infectious disease in animals in many countries (2, 3). Canine Distemper Virus is a multi-  
64 host virus that infects animals from a wide taxonomic range, including canids, felids,  
65 mustelids, procyonids and phocids (3, 4). The main reservoir for this virus are dogs, but  
66 due to the broad host range (5), there is continual spill over between domesticated animals  
67 and wildlife (6). Disease signs include severe rash and both ocular and nasal discharge  
68 and over the course of infection animals often develop neurological signs including circling,  
69 hyperesthesia, seizures, cerebellar or vestibular disease, in the form of head tilting (7).  
70 Severe systemic infection can occur in immunologically naïve animals (3, 8), with long  
71 periods of viral shedding, with infection in domestic dogs previously reported to last as  
72 long as 90 days (9). CDV is highly contagious in many species of animals (6), and  
73 resultant mortality rates vary in animal populations and across the species affected (8). For  
74 example, mortality has ranged from 23% in the Chinese giant panda (*Ailuropoda*  
75 *melanoleuca*) (10) to 100% in ferrets (*Mustela putorius furo*) (11). The origin and  
76 transmission of CDV infections, particularly in non-canidae species, such as ferrets, is  
77 poorly understood (9, 12, 13). Ferrets are a widely used experimental animal to study the  
78 pathogenesis and transmission of a variety of viral diseases including influenza, SARS-  
79 CoV-1 and -2, Ebola, rabies and a range of paramyxoviruses (14, 15), and are therefore  
80 an important animal to protect from unwanted, potentially fatal infections such as CDV.

81 Currently there are 17 distinct geographically-associated genetic lineages of CDV  
82 described globally (5, 16). On some continents there may be more than one lineage and  
83 for many, the evolutionary genetics have been well resolved (5, 17). However CDV has not  
84 been well documented in Australia (11), with only 48 reported cases in dogs and ferrets  
85 from 2006-2014, and limited information on the emergence and spread of CDV (11, 18,  
86 19). This is further exacerbated by the total lack of publicly available genetic sequences  
87 from outbreaks in Australia.

88 There is a global vaccination strategy in place for the management and control of CDV  
89 with most countries, including Australia, generally utilizing a modified live attenuated  
90 vaccine based on the Onderstepoort strain. While this strategy is important in controlling  
91 this virus in dogs (8, 16, 20) there are a number of records where there is evidence of  
92 vaccine-induced CDV infections in both domesticated dogs and in wildlife through  
93 reversion of attenuation in the vaccine strain (6, 21). For example, CDV cases in wildlife

94 due to the vaccine strain infection have been reported in South Africa and the UK (6, 22,  
95 23). In Australia, routine vaccination is available for domesticated dogs, with vaccination  
96 normally given to puppies and other domestic animals at risk of contracting CDV, such as  
97 domesticated ferrets (11), using a live attenuated CDV. Despite a large-scale ongoing  
98 vaccination strategy in Australia, strains of CDV continue to circulate in animal populations  
99 (11). For example, in a study conducted from 2006-2014 in dogs and ferrets in Australia, it  
100 was reported that there were confirmed or suspected cases of CDV in five states/territories  
101 with most cases reported in New South Wales, including two out of three tested ferrets  
102 (11). However data pertaining to CDV epidemiology in Australia is limited, and the modes  
103 and rates of infection and mortality are not well understood.

104 In this study we report an outbreak of CDV in the ferret population in the Australian state of  
105 Victoria in 2019. CDV was detected in ferrets supplied to two independent research  
106 facilities from different breeders, indicating that this outbreak likely occurred across wide  
107 regions of the state. Herein we describe this CDV outbreak based on clinical signs and  
108 qRT-PCR CDV detection and describe the histopathology of severe cases. To better  
109 discriminate the dynamics of the outbreak we developed an assay to discriminate between  
110 a commercial CDV vaccine and the field strain. By full genome sequencing we also  
111 determined that the CDV in this outbreak originated from a novel lineage of CDV.

112

## 113 **Methods and Materials**

### 114 *Ethics Statement*

115 Work with ferrets at The Peter Doherty Institute for Infection and Immunity (hereafter  
116 Doherty Institute) was conducted with the approval of the Melbourne University Animal  
117 Ethics Committee (AEC# 1714278). Animals that had severe disease signs received  
118 veterinary intervention and were humanely euthanised in accordance with ethical  
119 guidelines. Experiments using ferrets at the Australian Centre for Disease Preparedness  
120 (ACDP) were approved by the ACDP Animal Ethics Committee (AEC# 1956). All work at  
121 the Doherty Institute and ACDP was performed in strict accordance with the Australian  
122 Government, National Health and Medical Research Council Australian code of practice  
123 for the care and use of animals for scientific purposes (24).

124

125

126 *Ferrets*

127 Ferrets used for experimental purposes at the Doherty Institute and the ACDP were  
128 obtained from three different ferret breeders (2 supplied the Doherty Institute and 1  
129 supplied ACDP) in the state of Victoria, Australia. The breeders are located at different  
130 locations outside of the Melbourne metropolitan region and provided ferrets at regular  
131 intervals to both facilities throughout 2019.

132 *CDV Vaccines*

133 The Protech C3 vaccine (Boehringer Ingelheim, Australia), comprising a live-attenuated  
134 CDV was administered at both the Doherty Institute and ACDP to control the respective  
135 CDV outbreaks. The dose administered varied between institutions: at the Doherty  
136 Institute 0.2ml was administered to each ferret and at the ACDP 0.25ml was administered,  
137 regardless of age or weight. At both facilities two doses were administered, however at the  
138 Doherty Institute doses were 2 weeks apart and at the ACDP doses were administered 4  
139 weeks apart. The Protech C3 vaccine has been approved for dogs in Australia and the  
140 standard dose administered to dogs is 1ml.

141 *Histology and Immunohistochemistry*

142 Tissues collected for histology processing at ACDP were fixed in 10% neutral buffered  
143 formalin, processed and embedded in paraffin using standard procedures, sectioned at 4  
144  $\mu\text{m}$ , and stained with hematoxylin and eosin (H&E). For immunohistochemistry (IHC),  
145 paraffin-embedded tissue sections were quenched for 10 min in aqueous 10% hydrogen  
146 peroxide. Antigen retrieval was performed by using the Agilent PT Link (Dako, Agilent, Vic,  
147 Australia) module for 30 min at 97°C in pH 9 antigen retrieval solution. A mouse  
148 monoclonal antibody targeting the nucleocapsid protein of CDV (CDV-NP, VMRD, WA,  
149 USA) was used at a dilution of 1:2000 (60 min incubation), sections were incubated with  
150 Mouse linker (Dako), then visualised using an Envision Flex horseradish peroxidase  
151 (HRP)-secondary antibody (DM822, Dako) for 20 minutes (goat anti-rabbit and anti-mouse  
152 immunoglobulins), followed by chromogen aminoethyl carbazole (AEC), and then  
153 counterstained with Lillie-Mayer's Haematoxylin and Scotts Tap Water. Sections were  
154 digitised using a Panoramic Scan II (3DHISTECH Ltd, Budapest, Hungary) whole slide  
155 imager before photomicrographs were taken using the image capture function of the  
156 CaseViewer software (3DHISTECH Ltd).

157

158 *Identification of ferrets with CDV by Real-Time PCR*

159 Two different PCR approaches were used across the two research facilities. At the  
160 Doherty Institute a commercial CDV quantitative real-time reverse-transcriptase PCR  
161 (qRT-PCR) was initially employed followed by the development of a discriminatory assay.  
162 All ferrets received into the facility were tested. At ACDP, a pan-morbillivirus RT-PCR was  
163 applied for detection of CDV from ferrets with clinical symptoms (25).

164  
165 At the Doherty Institute nasal wash samples were collected from lightly sedated ferrets.  
166 Ferrets were sedated by intramuscular injection of a combination of ketamine (12.5mg/kg,  
167 Troy Laboratories) and xylazine (2.5mg/kg, Troy Laboratories). We instilled 1 mL of sterile  
168 PBS into one nostril and allowing the liquid to flow out of the other nostril into a collection  
169 tube. Nasal wash samples were immediately stored at -80°C until RNA extraction. RNA  
170 was extracted from 140µl of nasal wash sample using the QIAamp Viral RNA Mini kit  
171 (QIAGEN, Australia), according to the manufacturer's instructions. RNA was also extracted  
172 from the Protech C3 vaccine (Boehringer Ingelheim, Australia) following reconstitution  
173 according to manufacturer's instructions.

174 Primers were developed for a number of purposes (Table 1). First, to develop a  
175 discriminatory PCR assay to distinguish between the outbreak virus and the vaccine virus,  
176 second to amplify genes of interest (NP, H, and F) and finally for whole genome  
177 sequencing (WGS) (Table 1). At the Doherty Institute, primers designed in this study were  
178 created from conserved regions of similar sequences to the wild type strain of CDV found  
179 in Victorian ferrets (percentage identity ~92%) retrieved from GenBank using (Basic Local  
180 Alignment Tool) Blastn. Primers were created with both Primer-BLAST (NCBI), and  
181 Geneious R10 (Biomatters, Auckland, New Zealand).

182 qRT-PCR was performed using the SensiFAST Probe Lo-ROX One-Step kit (Bioline  
183 Meridian, Australia) with a reaction volume of 20µl. The reaction mix contained 4ul RNA,  
184 40µM of each primer and 10µM of the associated probe. Thermocycling conditions  
185 comprised a reverse transcriptase step at 45°C for 10 minutes, followed by a denaturation  
186 step at 95°C for 2 minutes and 40 cycles of 95°C for 5 seconds and 60°C for 15 sec. The  
187 assay designed here was validated against a commercially available CDV assay the  
188 Canine Distemper Virus Detection qPCR (Genesig, United Kingdom).

189 To discriminate between the outbreak virus and the vaccine strain a discriminative qRT-  
190 PCR was developed using a two-probe assay (Table 1) with the SensiFAST Probe Lo-

191 ROX One-Step kit (Meridian Biosciences). The reaction mix contained 10 $\mu$ M of each  
192 probe, 40 $\mu$ M of each primer with a final reaction volume of 20 $\mu$ l and the same  
193 thermocycling conditions were used as specified above.

194 At ACDP, both fresh and formalin-fixed-paraffin-embedded (FFPE) tissues including brains  
195 and nasal swabs from ferrets with clinical symptoms were used for RNA extraction and  
196 PCR testing. Total RNA was extracted from fresh or FFPE tissue samples. For fresh tissue  
197 samples, fifty microlitre of supernatant of 10% tissue homogenates from relevant ferrets  
198 was utilised by using the MagMax 96 Viral RNA Kit (ThermoFisher Scientific) in a  
199 MagMAX Express Magnetic Particle Processor (ThermoFisher Scientific) following  
200 manufacturer's instructions. For FFPE samples, RNA was extracted from 4  $\mu$ M sections of  
201 formalin-fixed, paraffin-embedded brain/lung tissue, using RNeasy FFPE Kit (QIAGEN),  
202 following the manufacturer's instructions. The RNA was used for RT-PCR and Next-  
203 generation Sequencing (NGS) analysis.

204 A pan-morbillivirus RT-PCR, targeting the phosphate (P) gene of morbillivirus, was utilised  
205 for detection of CDV from ferrets with clinical symptoms (25) (Table 1). The RT-PCR  
206 assays were conducted by using SuperScript III One-Step RT-PCR System with Platinum  
207 Taq DNA polymerase (Invitrogen, Carlsbad, CA, USA). Amplifications were performed in  
208 an Eppendorf Master Cycler Model 5345 (Eppendorf, Hamburg, Germany). Each 25  $\mu$ L  
209 reaction contained 12.5  $\mu$ L 2X reaction mix, 1  $\mu$ L Superscript III RT/Platinum Taq mix, 0.9  
210  $\mu$ M (final concentration) of each primer and 5  $\mu$ L RNA template. The RT-PCR cycling  
211 conditions were as follows: one cycle of 48 $^{\circ}$ C for 30 min for cDNA synthesis; one cycle of  
212 94 $^{\circ}$ C for 2 min for denaturing; followed by 45 amplification cycles of 94 $^{\circ}$ C for 30 s, 50 $^{\circ}$ C  
213 for 60 s, 68 $^{\circ}$ C for 60 s and a final extension cycle of 68 $^{\circ}$ C for 7 min. Amplified PCR  
214 products (approx. 429 bp for P gene) were gel purified using QIAquick gel extraction kit  
215 (QIAGEN, Hilden, Germany) and sequenced using BigDye Terminator v3.1 Cycling  
216 Sequencing Kit (Applied Biosystems, Foster City, CA, USA) for confirmation.

217 Prevalence of CDV at the Doherty Institute was calculated using the *bioconf()* function in  
218 the Hmisc package (26) and prevalence differences between the field strain and vaccine  
219 strain at the Doherty Institute ferret facility were compared using a Chi-squared test.  
220 Differences in prevalence over time were compared using a generalized linear model with  
221 a binomial response and the statistically significant model was plotted using the *ggplot2*  
222 package (27). Analyses were conducted using R 4.0.2. integrated into RStudio 1.3.1073.

223

## 224 *Sanger Sequencing and Next-Generation*

225 Initial sequencing was done at the Doherty Institute with Sanger sequencing. RNA that  
226 was stored at -80°C and had undergone limited freeze thaw cycles was used for RT-PCR  
227 using the MyTaq One step RT-PCR kit (Meridian Biosciences) and primers designed for  
228 Sanger Sequencing (Table 1). Product sizes were confirmed using the e-Gel 2% agarose  
229 (GP) (Invitrogen, USA) followed by purification using the Exo-SAP-IT PCR product clean-  
230 up reagent (Thermofisher, Australia) according to manufacturer instructions. The purified  
231 template then underwent sequencing using the BigDye Terminator v3.1 Cycle sequencing  
232 kit (Thermofisher). The primers used for this step were 10% the concentration of the same  
233 primers used to generate PCR products, unless the primer had a M13 tail, in which case a  
234 M13 F(5'-TGTAACGACGGCCAGT-3') and R (5'-CAGGAAACAGCTATGACC3') was  
235 used. Sequencing was performed on a 3500XL Genetic Analyser (Applied Biosystems).  
236 Results were analysed using Lasergene 13 (DNASTAR, Madison, WI, USA).

237 For subsequent next-generation sequencing (NGS) at the Doherty Institute, RNA was  
238 extracted from stored (-80°C) nasal washes as described previously. Briefly, RT-PCR  
239 products were created using the Superscript IV One Step RT-PCR system (Thermofisher)  
240 and primers designed based on the results of Sanger Sequencing (Table 1). PCR product  
241 concentration was determined using a 4200 TapeStation System (Agilent Technologies,  
242 USA) and Genomic DNA Screentape (Agilent Technologies). The concentration of each  
243 sample was normalised to 6.6ng/µl and 30µl of DNA was used for Nextera DNA Flex  
244 Library Prep (Illumina, USA), performed according to manufacturer's instructions. Sample  
245 libraries were pooled and diluted to 200pm and 100µl of this diluted sample was loaded  
246 onto a flow cell for NGS using an iSeq 100 (Illumina). Sequences were assembled using  
247 reference mapping with paired ends in Geneious R10 (Biomatters) and Bowtie2 (28) was  
248 used for end to end alignment.

249 RNA extracted from both fresh and FFPE tissue samples from ferrets tested positive by  
250 pan-morbillivirus RT-PCR was used for NGS at ACDP. Both field strains sequenced  
251 comprised of FFPE samples, and all but one vaccine strains sequenced were from fresh  
252 samples.

253 At ACDP, the TruSeq RNA Library Prep Kit (Illumina, USA), following manufacturer's  
254 instructions was used for library construction, using an RNA concentration of 5 ng/µl. The  
255 libraries were normalised and pooled at equimolar ratios (final concentration of 12.5 pm  
256 each). The library pool was then loaded into flow cell of MiSeq Reagent Kit V2 (2 x 150



257 cycles) and sequenced in a MiSeq platform (Illumina), according to the manufacturer's  
258 instructions. The NGS sequence data was analysed using CLC Genomic Workbench 20  
259 (Qiagen) using standard parameters. The raw reads were quality-trimmed and viruses  
260 were assembled using a combination of read mapping (stand-alone read mapping, CLC  
261 Workbench algorithm) and *de novo* assembly (scaffolding, CLC Workbench algorithm) to  
262 generate consensus sequences.

263 All CDV sequences have been deposited in GenBank (Accession number: XXXX-XXXX).  
264 Sequences derived from the Protech C3 vaccine have been deposited with permission  
265 from the manufacturer (Boehringer Ingelheim).

266

### 267 *Phylogenetic Analysis*

268 Sequences were assembled in SeqMan Pro 13 (DNASTAR). Assembled sequences were  
269 compared through the using BLASTn (NCBI) to other available sequences in the non-  
270 redundant nucleotide (nr) database (29).

271 To reconstruct the evolutionary relationships, all CDV sequences available in GenBank  
272 were downloaded and all geographic and host species origins were cross referenced with  
273 publications if they were not available in the GenBank record. Full genomes, coding  
274 complete H gene or the 135bp F signal peptide were aligned using the MAFFT algorithm  
275 (30) executed in Geneious R10 (Biomatters). Maximum likelihood trees were estimated  
276 using PhyML (31) and implementing the appropriate nucleotide substitution model.  
277 Lineage information and appropriate rooting was mined from Duque-Valencia et al.(5).

278 A time-structured phylogeny was constructed using the same backbone sequences and  
279 parameters as previously published (17). Briefly, select sequences were downloaded and  
280 the H gene was aligned using MAFFT and a maximum likelihood tree was constructed  
281 using PhyML. The tree was imported into TempEst v1.5.3 (32) to ensure clock-like  
282 behaviour in the data. Using BEAST 1.10.4 (33), the data were analysed using a strict  
283 clock, the HKY+G+I substitution model and a constant size coalescent model. The  
284 analysis was run for 100,000,000 generation and convergence was assessed using Tracer  
285 V1.6. A maximum clade credibility tree was generated using TreeAnnotator v1.8 and  
286 visualized in FigTree v1.4

287

## 288 **Results**

### 289 *The Doherty Institute outbreak*

290 Starting in April 2019, ferrets with clinical disease consistent with CDV were observed in  
291 the Doherty Institute animal facilities during routine animal husbandry. Nasal wash  
292 samples were collected from animals with clinical signs (as described below) and tested  
293 for CDV using the Canine Distemper Virus Detection qPCR (Genesig). In response, the  
294 Doherty Institute animal facility introduced routine vaccination of ferrets prior to their arrival  
295 at the Institute, starting in mid April of 2019, 10 days following the confirmation of the index  
296 case of CDV (Fig 1).

297 Between April 2019 and December 2019, all 179 animals that entered the Doherty Institute  
298 Biological Resource Facility (BRF) were tested for CDV following arrival. Of these animals,  
299 115 were positive (64%) for CDV by RT-PCR. Using the discriminative assay developed  
300 here, we tested 103 of these 115 CDV positive samples and detected two different strains  
301 of CDV – a field strain causing the initial outbreak and the strain used in the Protech C3  
302 vaccine. Of the 103 animals screened with the discriminative assay, 100 were vaccinated  
303 prior to sampling (approximately 3 weeks prior to nasal wash sampling). Overall, there was  
304 a statistically significant difference in the proportion of detections due to the field strain  
305 (39%) and vaccine strain (56%) ( $X^2=12.921$ ,  $df=1$ ,  $p=0.003$ ) (Fig 1). In 20 ferrets, both the  
306 vaccine and field strain of the virus were detected. Despite finding the vaccine strain in all  
307 sampling time periods following the routine introduction of CDV vaccination and having a  
308 higher overall prevalence, we found that the CDV outbreak caused by the field strain  
309 persisted for less than two months (Fig 1). Following the index cases on 3 April 2019, the  
310 field strain was detected in approximately 70% of animals on 7 May, 50% on 21 May, but  
311 was no longer detected in ferrets from June 2019. This is in contrast to the vaccine strain,  
312 which was consistently detected during the seven months following CDV vaccine  
313 implementation on 3 April (Fig 1). There was no statistically significant difference in  
314 disease outcomes (*i.e.* requiring euthanasia under the ethical guidelines) when comparing  
315 ferrets infected with the field strain and the vaccine strain; 3 ferrets positive for the vaccine  
316 strain were euthanised and 3 ferrets infected with the field strain were euthanised. An  
317 additional ferret that was negative for CDV was euthanised, and three additional ferrets  
318 that were not tested for CDV were euthanised (Table 2).

319

320

## 321 *ACDP Outbreak*

322 Coinciding with the first detection at the Doherty Institute animal facility (April 2019), ferrets  
323 at the animal holding facility for ACDP (CSIRO Werribee Animal Health Facility) began to  
324 experience clinical signs consistent with CDV infection (as described below). Unlike the  
325 Doherty Institute, no qPCR or discriminatory RT-PCR was leveraged to identify CDV  
326 positive ferrets. PCR was only used retrospectively. Rather, in response to clinical signs,  
327 quarantine measures were initially introduced to separate ferrets with clinical signs from  
328 unaffected ones. All ferrets with clinical signs and animals sharing cages regardless of  
329 clinical signs were euthanised to control the outbreak. A detailed breakdown of infection  
330 status and euthanasia from the ACDP outbreak are not available. Vaccination was  
331 introduced using a quarter of the standard dose of the Protech C3 vaccine. The initiation of  
332 vaccination coincided with the final detections of CDV in the facility; within two months of  
333 the initial vaccination, the CDV outbreak at ACDP was controlled.

## 334 *Clinical Signs*

335 Clinical signs of CDV observed in ferrets from both the Doherty Institute and ACDP  
336 included (Fig 2A) inguinal dermatitis, with rough, discoloured patches of skin appearing on  
337 the abdomen, (Fig 2B) hyperkeratosis of the footpads, also known as hardpad, (Fig 2C)  
338 dermatitis on the chin and mouth, with scaly patches forming, and/or ocular signs including  
339 uncontrolled eye twitching with mucopurulent ocular and nasal discharge, resulting in  
340 visible crusting around the eyes and nose (Fig 2). At the Doherty Institute, visible signs  
341 were mostly classified as mild, with the animals remaining active. However, 10 animals  
342 (including both animals that were not tested by qPCR [n=3] and those that were tested for  
343 CDV by qPCR [n=7] displayed more severe signs (Fig. 2C-D) and required immediate  
344 euthanasia in accordance with ethical requirements. Animals classified as suffering from  
345 severe disease also showed signs of decreased activity, lethargy and loss of appetite. Any  
346 one of these clinical signs as well as the appearance of lethargy, pyrexia, anorexia, or  
347 weight loss were determined to be significant enough to require veterinary  
348 intervention. Due to the implementation of a euthanasia strategy to contain the outbreak, a  
349 breakdown of disease severity was not available from ACDP. Necropsies were performed  
350 on all euthanised animals at the Doherty Institute and on selected cases at ACDP. Tissues  
351 taken at the Doherty Institute were sent to an external pathology service, however detailed  
352 results were not available. Tissues collected at ACDP were processed for histopathology  
353 assessment at ACDP, as described below.

354

355

356 *Histopathology and CDV immunohistochemistry*

357

358 Four ferrets with distemper-like clinical signs and one asymptomatic ferret from the ACDP  
359 outbreak were submitted for histopathological analysis. Three of the symptomatic ferrets  
360 were submitted early in the outbreak, another symptomatic ferret was submitted days after  
361 vaccination was introduced, along with an asymptomatic penmate. In these ferrets,  
362 necrosis and sloughing of the bronchiolar epithelium were observed in the lung. This was  
363 often accompanied by notable diffuse epithelial hyperplasia (Fig 3A) and occasionally with  
364 a lymphohistiocytic infiltrate. In some of the affected areas, frequent round eosinophilic  
365 inclusion bodies were detected in the cytoplasm and nucleus of bronchial/bronchiolar  
366 epithelial cells (Fig 3A). Occasional multinucleated syncytial cells were found lining alveoli.  
367 Similar syncytial cells and intracytoplasmic/intranuclear inclusion bodies were identified in  
368 hyperplastic parts of the renal pelvic and urinary bladder urothelium (Fig 3B). The skin  
369 over the nasal planum was also hyperplastic with prominent parakeratotic hyperkeratosis  
370 emanating most notably from hair follicles. Associated suppurative inflammation was also  
371 occasionally observed in the subjacent dermis.

372

373 In addition to above lesions, multifocal to coalescing patches of the lymph node cortex  
374 were depleted in lymphocytes (Fig 3C). In the more severely affected lymph nodes, these  
375 lymphocyte-depleted areas in the cortex were replaced by oedema, fibrin, histiocytes and  
376 fibroplasia (Fig 3C). Taken together, the histopathologic features described above were  
377 consistent with pathology typically associated with CDV infection in ferrets.

378

379 Immunohistochemistry targeting the nucleocapsid protein of CDV showed that viral  
380 replication was widespread and intense, affecting many organ systems, even in animals  
381 with minimal histopathologic changes. Antigen was detected in the epithelium of the  
382 respiratory tract (Fig 3D), renal pelvis (Fig 3E), skin of the nasal planum, biliary tract,  
383 alimentary tract, female reproductive tract, lacrimal gland and salivary gland. High viral  
384 antigen burden was also observed in lymph nodes and spleen. Round cells with  
385 morphology consistent with histiocytes and lymphocytes were the main targets in these  
386 lymphoid organs (Fig 3F). In the brain, viral antigen was detected in only few mononuclear  
387 cells infiltrating the choroid plexus. Rare antigen positive round cells were also identified  
388 scattered in the olfactory bulb. This widespread multi-systemic infection was consistent  
389 with previously reported distemper infections in ferrets and dogs (34, 35).

## 390 *Sequence analysis and evolutionary genetics*

391 We sequenced 3 complete genomes corresponding to the field strain of CDV, in addition  
392 to 8 complete genomes of the CDV vaccine strain from ferrets. Both the field and vaccine  
393 strain viral genomes sequenced at the Doherty Institute were recovered from nasal wash  
394 samples. The field strain viral genomes from ACDP were sequenced from FFPE brains.  
395 Most vaccine strain viral genomes from ACDP were sequenced from fresh tissue samples  
396 (nasal swabs and brain) and only one was from FFPE brain. Analysis of the three field  
397 strain genomes sequenced across the two facilities showed only limited genetic diversity,  
398 with 99.78% nucleotide similarity in the H gene, 98.1% in the Fsp region and 99.5% across  
399 the full genome. This strongly suggests that the outbreaks in both facilities were due to the  
400 same virus strain; the most parsimonious explanation is that the outbreak was initiated in  
401 the breeding facilities supplying both the Doherty Institute and ACDP. As expected, there  
402 was limited diversity in the virus sequences from animals infected with the vaccine strains  
403 that were sequenced (n=7) with 99.83% similarity in the H gene, 98.5% in the Fsp region  
404 and 99.8% across the full genome. The genome sequences corresponding to the vaccine  
405 strain and the Onderstepoort strain shared 99% nucleotide similarity in the H gene, 98.5%  
406 in the Fsp region and 99.4% across the full genome.

407 Analysis of the H (Fig 4) and Fsp (Fig 5A) genes of the field strain viral sequences, regions  
408 of the CDV genome currently used for lineage discrimination (17), clearly demonstrated  
409 the divergent nature of the field strain. Indeed, based upon these genes and the full  
410 genome sequences (Fig 5B), and the current approach for lineage designation (*e.g.* (17),  
411 the field strain should be designated as a novel lineage. Critically, the field strain is highly  
412 divergent from both the Protech C3 vaccine itself and from virus sequences from ferrets  
413 vaccinated with this attenuated strain. More specifically, the H gene shared less than 93%  
414 nucleotide identity with all existing lineages of CDV, including the Protech C3 vaccine  
415 sequence [92.5% nucleotide similarity, 91.8% amino acid similarity] which we also  
416 sequenced in this study (Fig 4). Phylogenetically, the outbreak virus belonged to the  
417 lineage comprising “Vaccines (both the Protech C3 and the Onderstepoort strain which is  
418 used in most attenuated vaccines globally), Asia-3 and North America -1”, as defined by  
419 (5) (Fig 4). Furthermore, this sequence is highly divergent from other CDV sequences from  
420 mustelids, globally, with the exception of 4 sequences from China which fall into the “Asia-  
421 3” lineage (Fig 4). Other mustelid sequences fell into an array of lineages, although the  
422 vast majority belonged to the “Asia-1” lineage (Fig 4). As outlined in previous studies, the  
423 H gene phylogeny is dictated largely by geography, and we speculate that the field strain

424 reported here is representative of CDV currently circulating in Australia, however, as there  
425 are no available sequences in GenBank with which to compare, this cannot be confirmed.

426 We found similar patterns in the Fsp gene and full genome analyses (Fig 4). Phylogenetic  
427 analysis consistently demonstrated the field strain as being highly divergent (Fig 5), with  
428 the closest lineage being the “Vaccine/Asia-3/North America-1” clade and with high  
429 divergence from other mustelid CDV sequences. The Fsp region analysis of the novel  
430 Australian ferret lineage showed high divergence from other sequences, with only 73.88%  
431 of the nucleotide identity shared by both the vaccine and the Onderstepoort strain (Fig. 5B)  
432 compared to analysis of the full genome which shares approximately 91% identity with  
433 other reported strains (Fig. 5A).

434 Utilizing the framework presented by Duque-Valencia et al (2019) we aimed to estimate  
435 the divergence of the CDV viruses presented in this study (Fig 6). As we used the same  
436 BEAST parameters, including the use of a strict molecular clock, we were unable to  
437 include viruses from the “Vaccine clade” as these viruses have been passaged in cells and  
438 don’t have the same evolutionary rate as viruses infecting animals. Using this approach,  
439 we estimated the date that the field strain described here has branched from other clades  
440 between 1623.96 – 1878.9 (95% highest posterior density [HPD]) (Fig 6). It is also worth  
441 noting that with the addition of the sequences we generated in this study, tMRCA of the  
442 entire tree is significantly older than that presented in Duque-Valencia et al. (2019) but  
443 aligns more closely with Jo et al. (2019). While this analysis is useful in demonstrating the  
444 substantial period of time since these sequences have diverged from the closest lineage, it  
445 is important to take the specific dates merely as a guide. By also running this tree with an  
446 uncorrelated relaxed lognormal clock we were able to incorporate the vaccine strain,  
447 however this approach moves tMRCA much further back in time. This approach confirms  
448 that the divergence of CDV strains causing the outbreak described in this study occurs  
449 before the bifurcation of the “vaccine” clade from the “Asia-3” and “North America-1”  
450 clades, which is illustrated in all the maximum likelihood trees presented (Fig 4, 5).

451

## 452 **Discussion**

453 The outbreak of distemper in ferrets in Victoria, Australia in 2019 described here  
454 represents one of the few outbreak investigations of CDV reported in Australia. Further, it  
455 is the first to describe and analyse the evolutionary genetics of CDV in Australia. Despite  
456 the new data presented here, the epidemiology, ecology and evolution of CDV in Australia

457 remains entirely unknown, including the source and reservoir of the CDV lineage that  
458 infected the ferrets reported in this study.

459 The first documented CDV outbreak in Australia occurred in 1983 and involved over 1000  
460 cases across 3 states and was associated with racing Greyhounds (19). Since then,  
461 outbreaks have been limited and with only a few reports. There are three contemporary  
462 reports: one recorded outbreak comprising 16 cases in 2004-05 in unvaccinated dogs in  
463 New South Wales including Sydney (18), in 2011 there was a suspected outbreak in  
464 Victoria, although there is no report in the literature (11), and a case study reports  
465 distemper in ferrets in a rescue facility in Victoria (36). Wylie et al (2016) presented the  
466 most comprehensive contemporary assessment of CDV in Australia, reporting a total of 48  
467 cases spread between 2006-2014. This study demonstrated the presence of CDV  
468 predominantly in the south-eastern states of Australia and one detection in the Northern  
469 Territory. Unfortunately, due to the disparity of the data it is unclear whether CDV was truly  
470 restricted to these areas, or, rather if CDV is widespread but no samples have been  
471 collected or outbreaks reported in other regions of Australia. Furthermore, due to the  
472 limited data it is unclear what the prevalence of CDV is in eastern Australia, in dogs or in  
473 other susceptible species. This is compounded by a lack of studies in wildlife in Australia  
474 such that it is unclear if CDV is maintained in dogs in Australia, or is maintained in wildlife  
475 such as Dingos (*Canis lupus dingo*), or introduced by feral animals such as foxes (*Vulpes*  
476 *vulpes*) (37) or ferrets (38). Due to these uncertainties, the origin and extent of the  
477 outbreak reported here remains opaque. While we report outbreaks of CDV at two  
478 research centres, we recognize that the outbreaks in these facilities may act as potential  
479 indicators for a larger outbreak within the Australian ferret population. From the reported  
480 outbreak in these facilities, we can only guess at which animals played a role as reservoirs  
481 in Victoria and were the source of the outbreak, the mechanism of transmission to ferret  
482 breeders and the extent of the outbreak in breeding facilities or elsewhere in the state.

483 Due to the complete lack of sequence data and only sporadic outbreaks and detection of  
484 CDV in Australia in the last 40 years, it is unclear whether previous CDV outbreaks in  
485 Australia were due to reversions of the vaccine strain or whether another lineage of CDV  
486 has been circulating on the continent. Through a combination of a discriminatory PCR  
487 assay and full genome sequencing we reveal a novel and highly divergent lineage of CDV  
488 infecting Australian ferrets. While this novel lineage is related to the “Vaccine/Asia-3/North  
489 America-1” lineages, a time-structured Bayesian phylogenetic analysis suggested that the  
490 novel field strain revealed here diverged from all other reported lineages well over 200

491 years ago. While we have identified a novel lineage, it is entirely unclear whether this  
492 constitutes an Australian lineage that has been geographically isolated since the  
493 divergence from the Vaccine/Asia-3/North America-1, or constitutes a lineage that was  
494 cryptically circulating elsewhere and has only recently been introduced to Australia. It is  
495 notable that there are a number of lineages circulating on most continents and in countries  
496 where CDV has been investigated (17, 39, 40), so it is not unreasonable to assume long -  
497 term circulation in Australia, and, whether additional viral diversity will be found in Australia  
498 remains to be determined.

499 In addition to detecting a novel lineage, we found that 51% of ferrets tested with a  
500 discriminatory PCR were still positive for the vaccine strain for up to 3 months after  
501 vaccination. The vaccine used in this study was a modified-live attenuated vaccine; the  
502 virus still has the ability to replicate in the animal and may have sufficient residual  
503 virulence to cause disease (41). Importantly, the safety and effectiveness of CDV vaccines  
504 are often tested in dogs, not mustelids (42). While the Protech C3 Vaccine is frequently  
505 used in Australia at present, there are other CDV vaccines on the global market that are  
506 subunit vaccines recommended specifically for use in ferrets, for example the Purevax  
507 Ferret Distemper Vaccine (Boehringer Ingelheim), which is a recombinant canarypox  
508 vector expressing the HA and F glycoproteins of canine distemper virus) that may prevent  
509 unwanted CDV symptoms seen in some ferrets (43). Despite some disease signs  
510 associated with the live attenuated CDV vaccine used in this study in ferrets, within 2  
511 months of initiating vaccination the prevalence of the field strain dropped to zero and the  
512 ferret CDV outbreaks were curbed at both the Doherty Institute and ADCP. Whether this  
513 coincides with the end of the CDV outbreak in ferret breeding facilities or was linked to the  
514 introduction of vaccination is unclear as no epidemiological data from the breeding  
515 facilities was available. Genetic analysis demonstrated a large genetic difference between  
516 this putative Australian lineage and the vaccine used in this outbreak (Protech C3  
517 Vaccine), with only ~92% nucleotide similarity and 91% by amino acid similarity. Whether  
518 this genetic difference corresponds to an antigenic difference that would lead to low  
519 vaccine protection (44) is unclear but warrants further investigation. It is notable that there  
520 have been previously reported cases in both the Americas and in the UK of vaccine  
521 escape (23, 45), particularly when the Rockborn strain of the virus was used for  
522 vaccination (45).

523 Ferrets with signs of CDV in this outbreak varied in disease severity, in contrast to the very  
524 high mortality rates, with some outbreaks comprising a 100% mortality rate, reported



525 previously in mustelids (11, 46, 47). This lower mortality, specifically at the Doherty  
526 Institute, may have been in part due to intervention measures that were used on  
527 suspected CDV infected ferrets, such as injections of vitamin A (36, 48), the brief time  
528 period between identification of disease signs and interventions (1-2 days), and the  
529 decision to cull ferrets at an early disease stage in order to control the spread of the  
530 outbreak. The disease signs observed in animals that required intervention did not display  
531 the full extent of morbidity previously reported (12, 13), however, this may similarly be  
532 confounded by the decision to intervene early in the disease course in order to contain the  
533 outbreak. Therefore, in the current investigation, the true pathogenicity of this new CDV  
534 strain remains unclear. A dedicated experimental challenge trial in ferrets will be required  
535 in order to determine this. Nevertheless, in ferrets submitted for histopathology, the typical  
536 profile of distemper pathology and multi-systemic virus replication were observed which  
537 suggests that, at least for a subset of infected ferrets, the highly divergent CDV strain  
538 described in our current study is capable of producing typical CDV-induced disease.

539 Overall CDV continues to pose a large disease burden, globally (49). In addition to dogs,  
540 this virus also has an impact on wildlife, with a number of examples of CDV infection in  
541 large cats, hyenas and jackals from many parts of Africa (8, 50). Due to the broad host  
542 range of CDV, cross-species infection is known to occur (50, 51), with the same lineages  
543 of CDV having been detected in canids, felids, mustelids and even seals. This is of  
544 concern, particularly in Australia, where several species of native fauna are currently at  
545 risk of extinction due to other factors (52). If this strain of CDV was to potentially infect  
546 these at-risk and immunologically naive animals, it could potentially result in widespread  
547 disease and high rates of mortality (6). One of the limiting factors in mounting an  
548 appropriate response would be the lack of established methods for CDV surveillance  
549 across the country (11). Specifically, following vaccination with a live attenuated vaccine,  
550 current diagnostic assays may not be able to accurately discriminate between the  
551 presence of vaccine or a circulating strain. Due to the geographic isolation of some parts  
552 of Australia it is possible that other genetically distinct strains of CDV are present in the  
553 country, such that the discriminatory PCR developed here may have limited value in an  
554 outbreak with a different lineage. Currently CDV diagnosis is still best achieved through a  
555 combination of histopathology and qRT-PCR and should be interpreted in the context of  
556 case history and clinical presentation (11). The detection of this novel lineage signals the  
557 need, not only for more widespread surveillance of CDV in Australia, but also for  
558 sequencing of any viruses that are detected to better understand the diversity of this  
559 lineage and to reveal any other lineages that may be circulating on the continent. As the

560 ferrets reported in this study were sourced from regional breeders, the presence of CDV in  
561 this population may indicate that the virus is present in both domestic and wild animals in  
562 the state of Victoria. Our study describes the endpoint of an outbreak of CDV and  
563 highlights the crucial need for CDV surveillance and sequencing to better disentangle CDV  
564 ecology and evolution which is a key component for future outbreak response and control.

565

## 566 **Acknowledgements**

567 We would like to thank the staff at the Biological Resource Facility at the Doherty Institute  
568 as well as the CSIRO Werribee Animal Health Facility for their assistance with animal  
569 husbandry. We would also acknowledge Mr Honglei Chen (ACDP) for technical assistance  
570 with NGS and Dr. Mark Ford for assistance with veterinary queries (ACDP). We  
571 acknowledge the use of the CSIRO Australian Centre for Disease Preparedness,  
572 grid.413322.5 in undertaking this research.

573

## 574 **Funding statement**

575 The WHO Collaborating Centre for Reference and Research on Influenza is funded by the  
576 Australian Department of Health. Michelle Wille is funded by an Australia Research  
577 Council Discovery Early Career Research Award (DE200100977).

578

579

580 **References**

- 581 1. Rima B, Balkema-Buschmann A, Dundon WG, Duprex P, Easton A, Fouchier R,  
582 Kurath G, Lamb R, Lee B, Rota P, Wang L, Consortium IR. 2019. ICTV Virus  
583 Taxonomy Profile: *Paramyxoviridae*. J Gen Virol 100:1593–1594. doi:  
584 <https://doi.org/10.1099/jgv.0.001328>.
- 585 2. Rendon-Marin S, da Fontoura Budaszewski R, Canal CW, Ruiz-Saenz J. 2019.  
586 Tropism and molecular pathogenesis of Canine Distemper Virus. Virol J 16:e30.  
587 doi: <https://doi.org/10.1186/s12985-019-1136-6>.
- 588 3. Martinez-Gutierrez M, Ruiz-Saenz J. 2016. Diversity of susceptible hosts in canine  
589 distemper virus infection: a systematic review and data synthesis. BMC Vet Res  
590 12:78. doi: 10.1186/s12917-016-0702-z.
- 591 4. Jo WK, Peters M, Kydyrmanov A, van de Bildt MWG, Kuiken T, Osterhaus A,  
592 Ludlow M. 2019. The Canine Morbillivirus strain associated with an epizootic in  
593 Caspian Seals provides new insights into the evolutionary history of this virus.  
594 Viruses 11:e894. doi: 10.3390/v11100894.
- 595 5. Duque-Valencia J, Sarute N, Olarte-Castillo XA, Ruiz-Saenz J. 2019. Evolution and  
596 interspecies transmission of Canine Distemper Virus - an outlook of the diverse  
597 evolutionary landscapes of a multi-host virus. Viruses 11:e582. doi:  
598 10.3390/v11070582.
- 599 6. Kennedy JM, Earle JAP, Omar S, Abdullah H, Nielsen O, Roelke-Parker ME, Cosby  
600 SL. 2019. Canine and Phocine Distemper Viruses: global spread and genetic basis  
601 of jumping species barriers. Viruses 11:e944. doi:  
602 <https://doi.org/10.3390/v11100944>.
- 603 7. Galan A, Gamito A, Carletti BE, Guisado A, de las Mulas JM, Perez J, Martin EM.  
604 2014. Uncommon acute neurologic presentation of canine distemper in 4 adult  
605 dogs. Can Vet J 55:373-378.
- 606 8. Loots AK, Mokgokong PS, Mitchell E, Venter EH, Kotze A, Dalton DL. 2018.  
607 Phylogenetic analysis of canine distemper virus in South African wildlife. PLoS ONE  
608 13:e0199993. doi: 10.1371/journal.pone.0199993.
- 609 9. Martinez-Gutierrez M, Ruiz-Saenz J. 2016. Diversity of susceptible hosts in canine  
610 distemper virus infection: a systematic review and data synthesis. BMC Vet Res  
611 12:e78. doi: 10.1186/s12917-016-0702-z.
- 612 10. Feng N, Yu Y, Wang T, Wilker P, Wang J, Li Y, Sun Z, Gao Y, Xia X. 2016. Fatal  
613 Canine Distemper Virus infection of giant pandas in China. Sci Rep 6:e27518. doi:  
614 <https://doi.org/10.1038/srep27518>.
- 615 11. Wyllie SE, Kelman M, Ward MP. 2016. Epidemiology and clinical presentation of  
616 canine distemper disease in dogs and ferrets in Australia, 2006-2014. Aust Vet J  
617 94:215-22.
- 618 12. Perpiñán D, Ramis A, Tomás A, Carpintero E, Bargalló F. 2008. Outbreak of canine  
619 distemper in domestic ferrets (*Mustela putorius furo*). Vet Rec 163:246-250.
- 620 13. Williams ES, Thorne ET, Appel MJ, Belitsky DW. 1988. Canine distemper in black-  
621 footed ferrets (*Mustela nigripes*) from Wyoming. J Wildl Dis 24:385-98.
- 622 14. Cross RW, Fenton KA, Geisbert TW. 2018. Small animal models of filovirus  
623 disease: recent advances and future directions. Expert Opin Drug Discov 13:1027-  
624 1040.
- 625 15. Kim YI, Kim D, Yu KM, Seo HD, Lee SA, Casel MAB, Jang SG, Kim S, Jung W, Lai  
626 CJ, Choi YK, Jung JU. 2021. Development of spike receptor-binding domain  
627 nanoparticle as a vaccine candidate against SARS-CoV-2 infection in ferrets.  
628 bioRxiv doi:10.1101/2021.01.28.428743.
- 629 16. Needle DB, Burnell VC, Forzan MJ, Dubovi EJ, Schuler KL, Bernier C, Hollingshead  
630 NA, Ellis JC, Stevens BA, Tate P, Anis E, Wilkes RP. 2019. Infection of eight

- 631 mesocarnivores in New Hampshire and Vermont with a distinct clade of canine  
632 distemper virus in 2016-2017. *J Vet Diagn Invest* 31:562-567.
- 633 17. Duque-Valencia J, Forero-Munoz NR, Diaz FJ, Martins E, Barato P, Ruiz-Saenz J.  
634 2019. Phylogenetic evidence of the intercontinental circulation of a Canine  
635 Distemper Virus lineage in the Americas. *Sci Rep* 9:15747.
- 636 18. Norris JM, Krockenberger MB, Baird AA, Knudsen G. 2006. Canine distemper: re-  
637 emergence of an old enemy. *Aust Vet J* 84:362-363.
- 638 19. Studdert V. 1983. Recent increase in canine distemper. *Aust Vet J* 60:8.
- 639 20. Gregers-Jensen L, Agger JF, Hammer ASV, Andresen L, Chriel M, Hagberg E,  
640 Jensen MK, Hansen MS, Hjulsager CK, Struve T. 2015. Associations between  
641 biosecurity and outbreaks of canine distemper on Danish mink farms in 2012-2013.  
642 *Acta Vet Scand* 57:e66: doi: <https://doi.org/10.1186/s13028-015-0159-2>.
- 643 21. Appell MJG. 1978. Reversion to virulence of attenuated Canine Distemper Virus *in*  
644 *vivo* and *in vitro*. *J Gen Virol* 41:385-393.
- 645 22. McCormick A. 1983. Canine distemper in African cape hunting dogs (*Lycaon*  
646 *pictus*): possibly vaccine induced. *J Zoo Anim Med* 14:66-71.
- 647 23. Martella V, Blixenkroner-Møller M, Elia G, Lucente MS, Cirone F, Decaro N, Nielsen  
648 L, Bányai K, Carmichael LE, Buonavoglia C. 2011. Lights and shades on an  
649 historical vaccine canine distemper virus, the Rockborn strain. *Vaccine* 29:1222-  
650 1227.
- 651 24. National Health and Medical Research Council. 2013. Australian code for the care  
652 and use of animals for scientific purposes, 8th ed. National Health and Medical  
653 Research Council, Canberra. 108pp.
- 654 25. Barrett T, Visser IK, Mamaev L, Goatley L, van Bresse MF, Osterhaust AD. 1993.  
655 Dolphin and porpoise morbilliviruses are genetically distinct from phocine distemper  
656 virus. *Virology* 193:1010-2.
- 657 26. Jr FEH. 2020. Hmisc: Harrell Miscellaneous. R package. [https://CRAN.R-](https://CRAN.R-project.org/package=Hmisc)  
658 [project.org/package=Hmisc](https://CRAN.R-project.org/package=Hmisc).
- 659 27. Wickham H. 2016. ggplot2: elegant graphics for data analysis. Springer-Verlag New  
660 York.
- 661 28. Langmead B, Salzberg SL. 2012. Fast gapped-read alignment with Bowtie 2.  
662 *Nature Methods* 9:357-359.
- 663 29. Zhang Z, Schwartz S, Wagner L, Miller W. 2000. A greedy algorithm for aligning  
664 DNA sequences. *J Comput Biol* 7:203-14.
- 665 30. Katoh K, Standley DM. 2013. MAFFT multiple sequence alignment software version  
666 7: improvements in performance and usability. *Mol Biol Evol* 30:772-80.
- 667 31. Guindon S, Dufayard JF, Lefort V, Anisimova M, Hordijk W, Gascuel O. 2010. New  
668 algorithms and methods to estimate maximum-likelihood phylogenies: assessing  
669 the performance of PhyML 3.0. *Syst Biol* 59:307-21.
- 670 32. Rambaut A, Lam TT, Max Carvalho L, Pybus OG. 2016. Exploring the temporal  
671 structure of heterochronous sequences using TempEst (formerly Path-O-Gen).  
672 *Virus Evol* 2:vew007. doi: 10.1093/ve/vew007.
- 673 33. Suchard MA, Lemey P, Baele G, Ayres DL, Drummond AJ, Rambaut A. 2018.  
674 Bayesian phylogenetic and phylodynamic data integration using BEAST 1.10. *Virus*  
675 *Evol* 4:vey016. doi: 10.1093/ve/vey016.
- 676 34. Headley SA, Oliveira TES, Pereira AHT, Moreira JR, Michelazzo MMZ, Pires BG,  
677 Marutani VHB, Xavier AAC, Di Santis GW, Garcia JL, Alfieri AA. 2018. Canine  
678 morbillivirus (canine distemper virus) with concomitant canine adenovirus, canine  
679 parvovirus-2, and *Neospora caninum* in puppies: a retrospective  
680 immunohistochemical study. *Sci Rep* 8:e13477: doi: [https://doi.org/10.1038/s41598-](https://doi.org/10.1038/s41598-018-31540-0)  
681 [018-31540-0](https://doi.org/10.1038/s41598-018-31540-0).

- 682 35. Lempp C, Spitzbarth I, Puff C, Cana A, Kegler K, Techangamsuwan S,  
683 Baumgartner W, Seehusen F. 2014. New aspects of the pathogenesis of canine  
684 distemper leukoencephalitis. *Viruses* 6:2571-2601.
- 685 36. Bonning L. 2018. Management of a Canine Distemper Virus outbreak in a ferret  
686 rescue facility. *Proceedings of the AVA Annual Conference 2018, Brisbane*.
- 687 37. Nouvellet P, Donnelly CA, De Nardi M, Rhodes CJ, De Benedictis P, Citterio C,  
688 Obber F, Lorenzetto M, Pozza MD, Cauchemez S, Cattoli G. 2013. Rabies and  
689 Canine Distemper Virus epidemics in the red fox population of northern Italy (2006-  
690 2010). *PLoS ONE* 8:e61588. doi: 10.1371/journal.pone.0061588.
- 691 38. Kiupel M, Perpinan D. 2014. Viral diseases of Ferrets, p 439-517. *In* Fox JG, Marini  
692 RP (ed), *Biology and Diseases of the Ferret*, third ed. John Wiley & Sons, Inc. 439-  
693 517pp.
- 694 39. Nikolin VM, Olarte-Castillo XA, Osterrieder N, Hofer H, Dubovi E, Mazzoni CJ,  
695 Brunner E, Goller KV, Fyumagwa RD, Moehlman PD, Thierer D, East ML. 2017.  
696 Canine distemper virus in the Serengeti ecosystem: molecular adaptation to  
697 different carnivore species. *Mol Ecol* 26:2111-2130.
- 698 40. Zhao J-J, Yan X-J, Chai X-L, Martella V, Luo G-L, Zhang H-L, Gao H, Liu Y-X, Bai  
699 X, Zhang L, Chen T, Xu L, Zhao C-F, Wang F-X, Shao X-Q, Wu W, Cheng S-P.  
700 2010. Phylogenetic analysis of the haemagglutinin gene of canine distemper virus  
701 strains detected from breeding foxes, raccoon dogs and minks in China. *Veterinary  
702 Microbiology* 140:34-42.
- 703 41. Jiang Y, Jia S, Zheng D, Li F, Wang S, Wang L, Qiao X, Cui W, Tang L, Xu Y, Xia  
704 X, Li Y. 2019. Protective immunity against Canine Distemper Virus in dogs induced  
705 by intranasal immunization with a recombinant probiotic expressing the viral H  
706 protein. *Vaccines* 7:e213: doi: 10.3390/vaccines7040213.
- 707 42. Sawatsky B, von Messling V. 2010. Canine Distemper Viruses expressing a  
708 hemagglutinin without N-glycans lose virulence but retain immunosuppression. *J  
709 Virol* 84:2753-2761.
- 710 43. Stephensen CB, Welter J, Thaker SR, Taylor J, Tartaglia J, Paoletti E. 1997.  
711 Canine Distemper Virus (CDV) infection of ferrets as a model for testing  
712 Morbillivirus vaccine strategies: NYVAC- and ALVAC-based CDV recombinants  
713 protect against symptomatic infection. *J Virol* 71:1506-1513.
- 714 44. Iwatsuki K, Tokiyoshi S, Hirayama N, Nakamura K, Ohashi K, Wakasa C, Mikami T,  
715 Kai C. 2000. Antigenic differences in the H proteins of Canine Distemper Viruses.  
716 *Vet Microbiol* 71:281-6.
- 717 45. da Fontoura Budaszewski R, Streck AF, Nunes Weber M, Maboni Siqueira F, Muniz  
718 Guedes RL, Wageck Canal C. 2016. Influence of vaccine strains on the evolution of  
719 Canine Distemper Virus. *Infect Genet Evol* 41:262-269.
- 720 46. Antinoff N, Giovanella CJ. 2012. Musculoskeletal and Neurologic Diseases, p 132-  
721 140, *Ferrets, Rabbits, and Rodents* doi:10.1016/b978-1-4160-6621-7.00010-5.
- 722 47. Wade LL. 2018. Vaccination of ferrets for rabies and distemper. *Vet Clin North Am  
723 Exot Anim Pract* 21:105-114.
- 724 48. Rodeheffer C, von Messling V, Milot S, Lepine F, Manges AR, Ward BJ. 2007.  
725 Disease manifestations of Canine Distemper Virus infection in ferrets are modulated  
726 by vitamin A status. *J Nutr* 137:1916-1922.
- 727 49. Harder TC, Kenter M, Vos H, Siebelink K, Huisman W, van Amerongen G, Orvell C,  
728 Barrett T, Appel MJ, Osterhaus AD. 1996. Canine Distemper Virus from diseased  
729 large felids: biological properties and phylogenetic relationships. *J Gen Virol*  
730 77:397-405.
- 731 50. Weckworth JK, Davis BW, Dubovi E, Fountain-Jones N, Packer C, Cleaveland S,  
732 Craft ME, Eblate E, Schwartz M, Mills LS, Roelke-Parker M. 2020. Cross-species

- 733 transmission and evolutionary dynamics of canine distemper virus during a spillover  
734 in African lions of Serengeti National Park. *Mol Ecol* 29:4308-4321.
- 735 51. Beineke A, Baumgartner W, Wohlsein P. 2015. Cross-species transmission of  
736 canine distemper virus-an update. *One Health* 1:49-59.
- 737 52. Woinarski JC, Burbidge AA, Harrison PL. 2015. Ongoing unraveling of a continental  
738 fauna: decline and extinction of Australian mammals since European settlement.  
739 *Proc Natl Acad Sci U S A* 112:4531-40.
- 740 53. Frisk AL, Konig M, Moritz A, Baumgartner W. 1999. Detection of canine distemper  
741 virus nucleoprotein RNA by reverse transcription-PCR using serum, whole blood,  
742 and cerebrospinal fluid from dogs with distemper. *J Clin Microbiol* 37:3634-3643.
- 743 54. Han JI, Chang DW, Na KJ. 2015. A multiplex quantitative real-time polymerase  
744 chain reaction panel for detecting neurologic pathogens in dogs with  
745 meningoencephalitis. *J Vet Sci* 16:341-347.
- 746 55. Wang J, Luo Y, Liang L, Li J, Cui S. 2018. A fast and simple one-step duplex PCR  
747 assay for canine distemper virus (CDV) and canine coronavirus (CCoV) detection.  
748 *Arch Virol* 163:3345-3349.

749

750

751 **Figure legends:**

752

753 **Figure 1. Time series of vaccine strain and field strain CDV prevalence in the**  
754 **Doherty Institute ferret facility.** Grey bars indicate when, and the number of samples  
755 tested using the discriminatory PCR developed here and tick marks are on the secondary  
756 Y axis. Points represent the individual point estimates for the vaccine strain and the field  
757 strain. Lines correspond to modelled prevalence using a generalized linear model and  
758 shaded areas represent the 95% confidence interval of the model. We were unable to  
759 generate a corresponding outbreak figure for ACDP as they did not use a discriminatory  
760 PCR.

761 **Figure 2. Clinical signs of animals infected with CDV.** Animals that developed visible  
762 signs of CDV had (A) mild abdominal rashes (as indicated by arrows) and (B) crusting of  
763 footpads. One animal developed (C) crusting around the mouth, however the majority of  
764 visible symptoms on the face consisted of crusting around the (D) eyes and (E) nose.

765 **Figure 3. Histopathology and immunohistochemistry (IHC) of ferrets from the CSIRO**  
766 **ACDP outbreak.** (A) H&E stain of the lung showing multiple eosinophilic intracytoplasmic  
767 (arrows) and intranuclear (arrowheads) inclusion bodies within bronchiolar epithelial cells.  
768 40x magnification. (B) CDV IHC of the lung with diffuse intense cytoplasmic labelling in the  
769 bronchial epithelium. 5x magnification. Inset shows the homogeneous to coarse granular  
770 and globular cytoplasmic labelling in the bronchial epithelium. 40x magnification. (C) H&E  
771 stain of the renal pelvis with multiple syncytial cells in the urothelium (arrows). 10x  
772 magnification. (D) CDV IHC of the renal pelvis, corresponding to panel C, with diffuse  
773 intense cytoplasmic labelling in the urothelium. 10x magnification. (E) H&E stained section  
774 of a lymph node with severe coalescing areas of lymphoid depletion in the cortex. These  
775 areas were replaced with patches of fibrin, oedema, histocytes and early fibroplasia  
776 (arrows and inset). Inset in panel E. corresponds to an area of lymphoid depletion as  
777 indicated by the arrows in panel E. 20x magnification. (F) CDV IHC of the lymph node  
778 corresponding to panel E illustrating antigen positive round cells were identified in the  
779 depleted cortex. 10x magnification. Inset shows antigen positive lymphocytes (arrowhead)  
780 and histiocytes (arrows) in an area of lymphocyte-depleted cortex. 40x magnification.

781

782 **Figure 4. Phylogenetic analysis of the H gene of CDV.** (A) Tree containing H gene of all  
783 CDV sequences available in GenBank. Tips are coloured by geographic region. Red

784 shapes with a thick black border corresponds to a vaccine strain. Shapes indicate host,  
785 with all mustelid hosts indicated by a triangle. (B) Expansion of the “Vaccine/Asia-3/North  
786 America-1” lineage which is indicated by a grey box in A, in addition to reference  
787 sequences for main lineages and all sequences from mustelids. Sequences generated in  
788 this study are presented in a grey and sequences from ferrets are in bold text. Both the  
789 Doherty Institute and ACDP generated a full genome of the Protech Vaccine Strain,  
790 indicated by a red triangle in the “Vaccine strain” clade. Scale bar indicates the number of  
791 substitutions per site. Support values are presented for major nodes.

792 **Figure 5: Phylogenetic analysis of (A) the full genome and (B) the F gene signal**  
793 **peptide.** Trees containing all sequences in Genbank are unrooted, and the subtree that is  
794 expanded is denoted. Tips are coloured by geographic region or vaccine strain. Shapes  
795 indicate host. Sequences generated in this study are presented in a grey box in B. Scale  
796 bar indicates the number of substitutions per site. Support values are presented for major  
797 nodes.

798 **Figure 5: Phylogenetic analysis of (A) the full genome and (B) the F gene signal**  
799 **peptide.** Trees containing all sequences in Genbank are unrooted, and the subtree that is  
800 expanded is denoted. Tips are coloured by geographic region or vaccine strain. Shapes  
801 indicate host. Sequences generated in this study are presented in a grey box in B. Scale  
802 bar indicates the number of substitutions per site. Support values are presented for major  
803 nodes.

804 **Figure 6. Time structured phylogeny of the H gene.** Reference sequences are those  
805 presented in Duque-Valencia et al (2019). We did not include any vaccine strains,  
806 including the vaccine strains from ferrets sequenced in this study because repeated  
807 passage of vaccine strains in laboratory settings does not reflect natural evolution.  
808 However we have included the tentative position of the vaccine clade for clarity only – the  
809 outgroup to Asia-3 and North America-1. This phylogenetic position is based upon  
810 maximum likelihood estimation in this study and Duque-Valencia et al (2019). Field strain  
811 sequences generated in this study are in bold. Scale bar represents time in years. Node  
812 labels correspond to posterior probabilities of each node. Grey bars comprise the 95%  
813 highest posterior density of the date estimate.



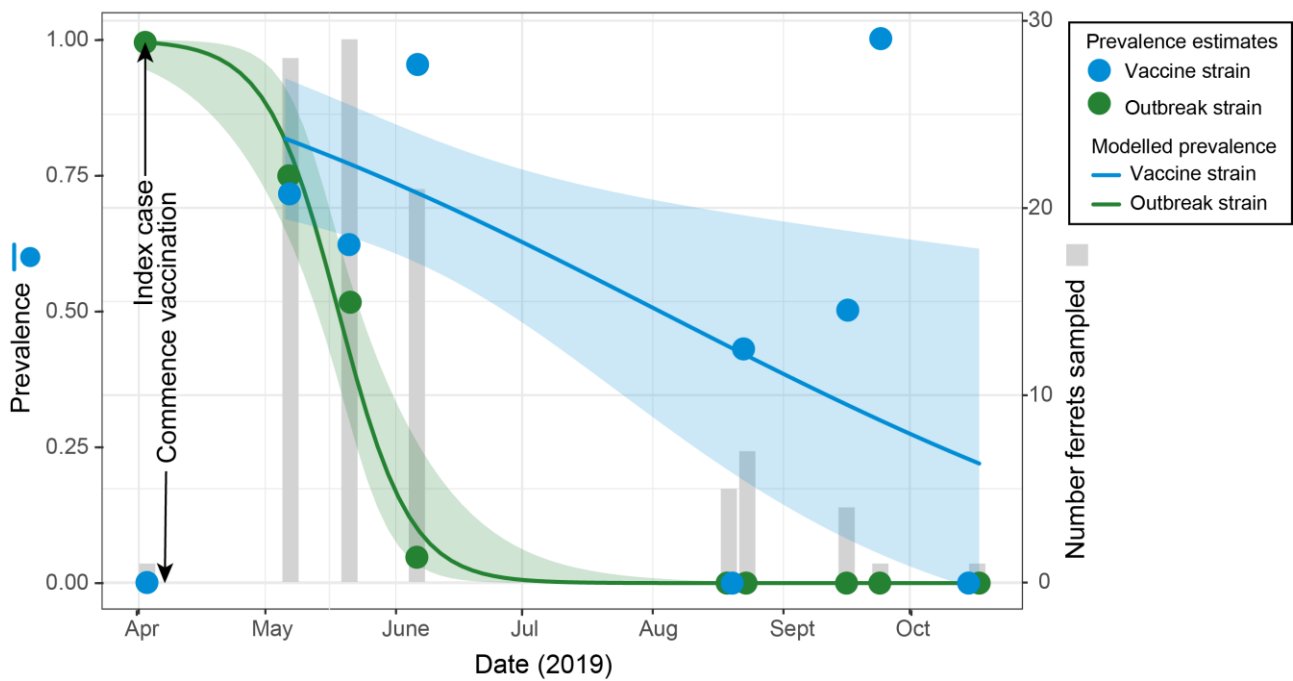

814

815 **Figure 1. Time series of vaccine strain and field strain CDV prevalence in the Doherty**  
816 **Institute ferret facility.** Grey bars indicate when, and the number of samples tested using the  
817 discriminatory PCR developed here and tick marks are on the secondary Y axis. Points represent  
818 the individual point estimates for the vaccine strain and the field strain. Lines correspond to  
819 modelled prevalence using a generalized linear model and shaded areas represent the 95%  
820 confidence interval of the model. We were unable to generate a corresponding outbreak figure for  
821 ACDP as they did not use a discriminatory PCR.

822

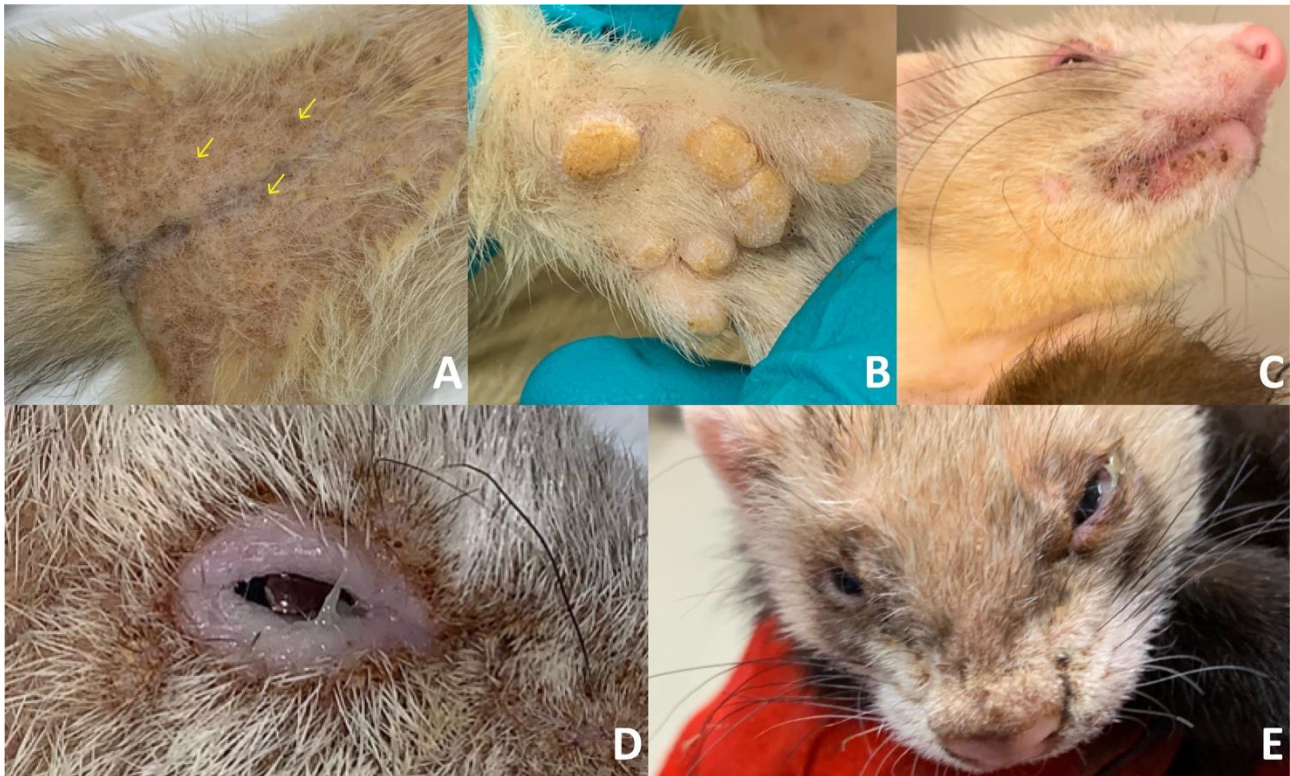

823

824

825

826

827

**Figure 2. Clinical signs of animals infected with CDV.** Animals that developed visible signs of CDV had (A) mild abdominal rashes (as indicated by arrows) and (B) crusting of footpads. One animal developed (C) crusting around the mouth, however the majority of visible symptoms on the face consisted of crusting around the (D) eyes and (E) nose.

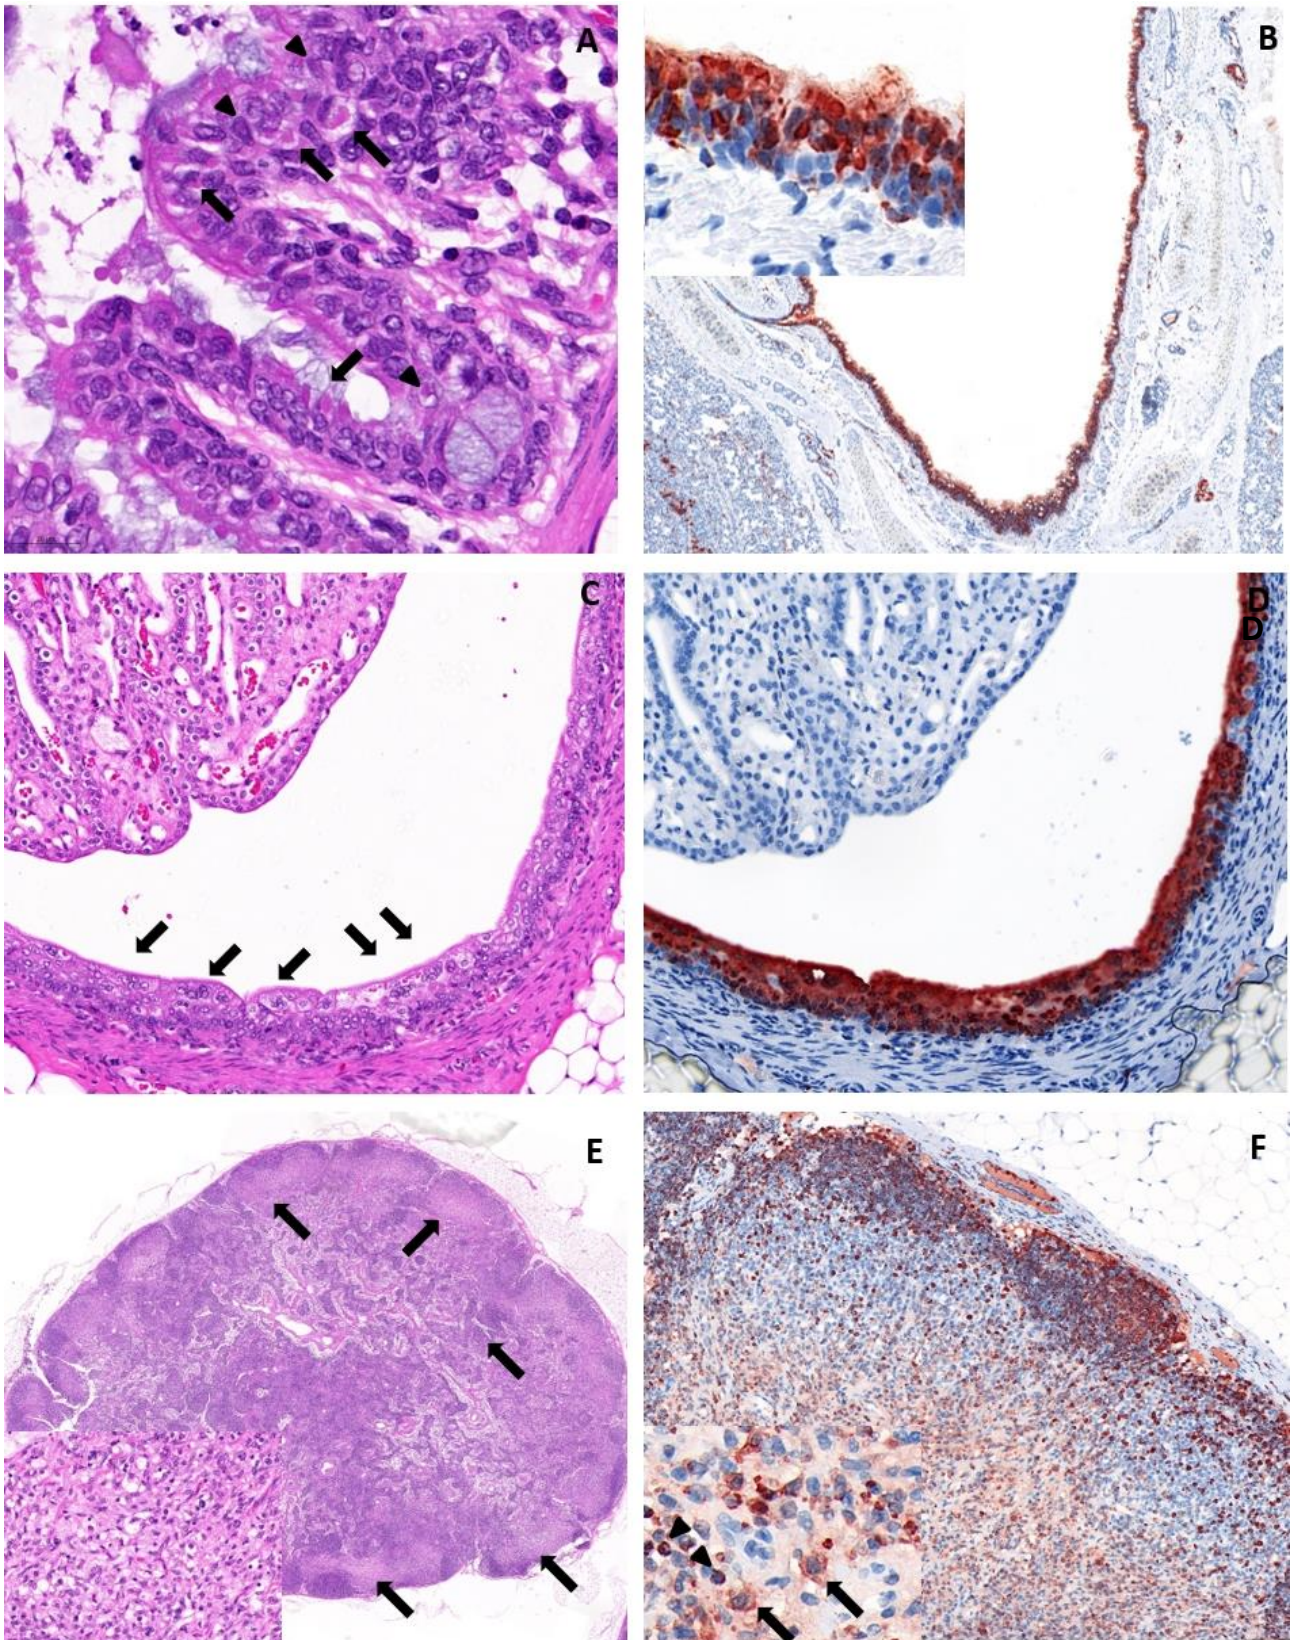

828  
829

830 **Figure 3.** Histopathology and immunohistochemistry (IHC) of ferrets from the CSIRO  
831 ACDP outbreak. (A) H&E stain of the lung showing multiple eosinophilic intracytoplasmic  
832 (arrows) and intranuclear (arrowheads) inclusion bodies within bronchiolar epithelial cells.  
833 40x magnification. (B) CDV IHC of the lung with diffuse intense cytoplasmic labelling in the  
834 bronchial epithelium. 5x magnification. Inset shows the homogeneous to coarse granular

835 and globular cytoplasmic labelling in the bronchial epithelium. 40x magnification. (C) H&E  
836 stain of the renal pelvis with multiple syncytial cells in the urothelium (arrows). 10x  
837 magnification. (D) CDV IHC of the renal pelvis, corresponding to panel C, with diffuse  
838 intense cytoplasmic labelling in the urothelium. 10x magnification. (E) H&E stained section  
839 of a lymph node with severe coalescing areas of lymphoid depletion in the cortex. These  
840 areas were replaced with patches of fibrin, oedema, histocytes and early fibroplasia  
841 (arrows and inset). Inset in panel E. corresponds to an area of lymphoid depletion as  
842 indicated by the arrows in panel E. 20x magnification. (F) CDV IHC of the lymph node  
843 corresponding to panel E illustrating antigen positive round cells were identified in the  
844 depleted cortex. 10x magnification. Inset shows antigen positive lymphocytes (arrowhead)  
845 and histiocytes (arrows) in an area of lymphocyte-depleted cortex. 40x magnification.

**A**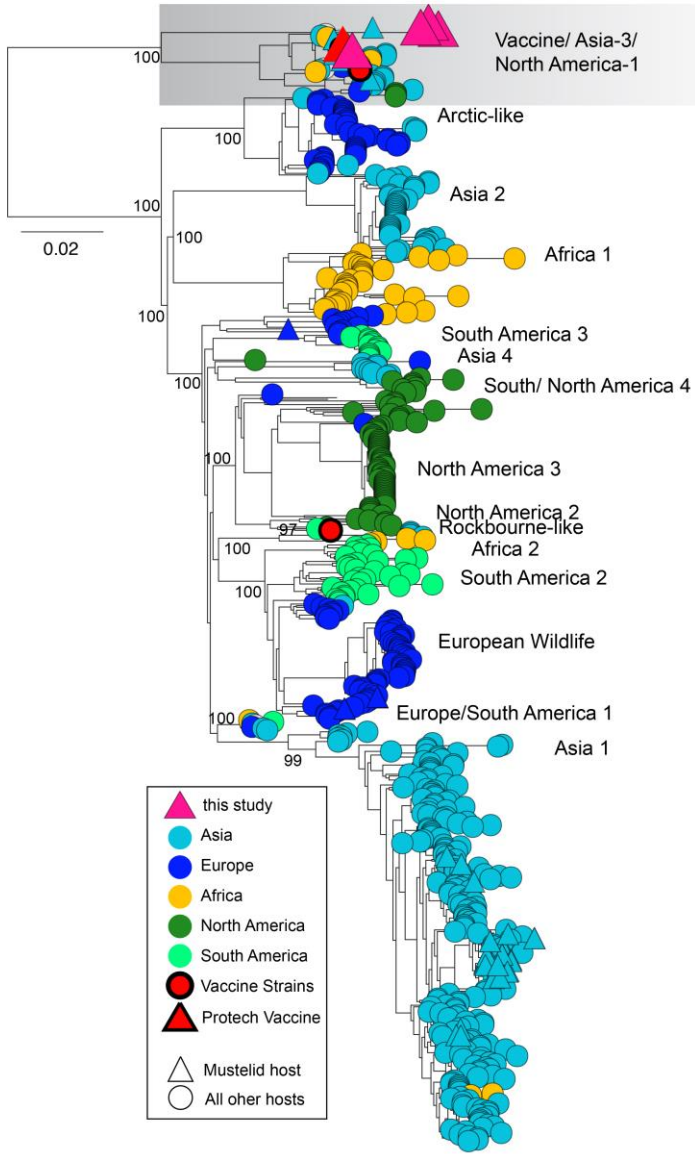**B**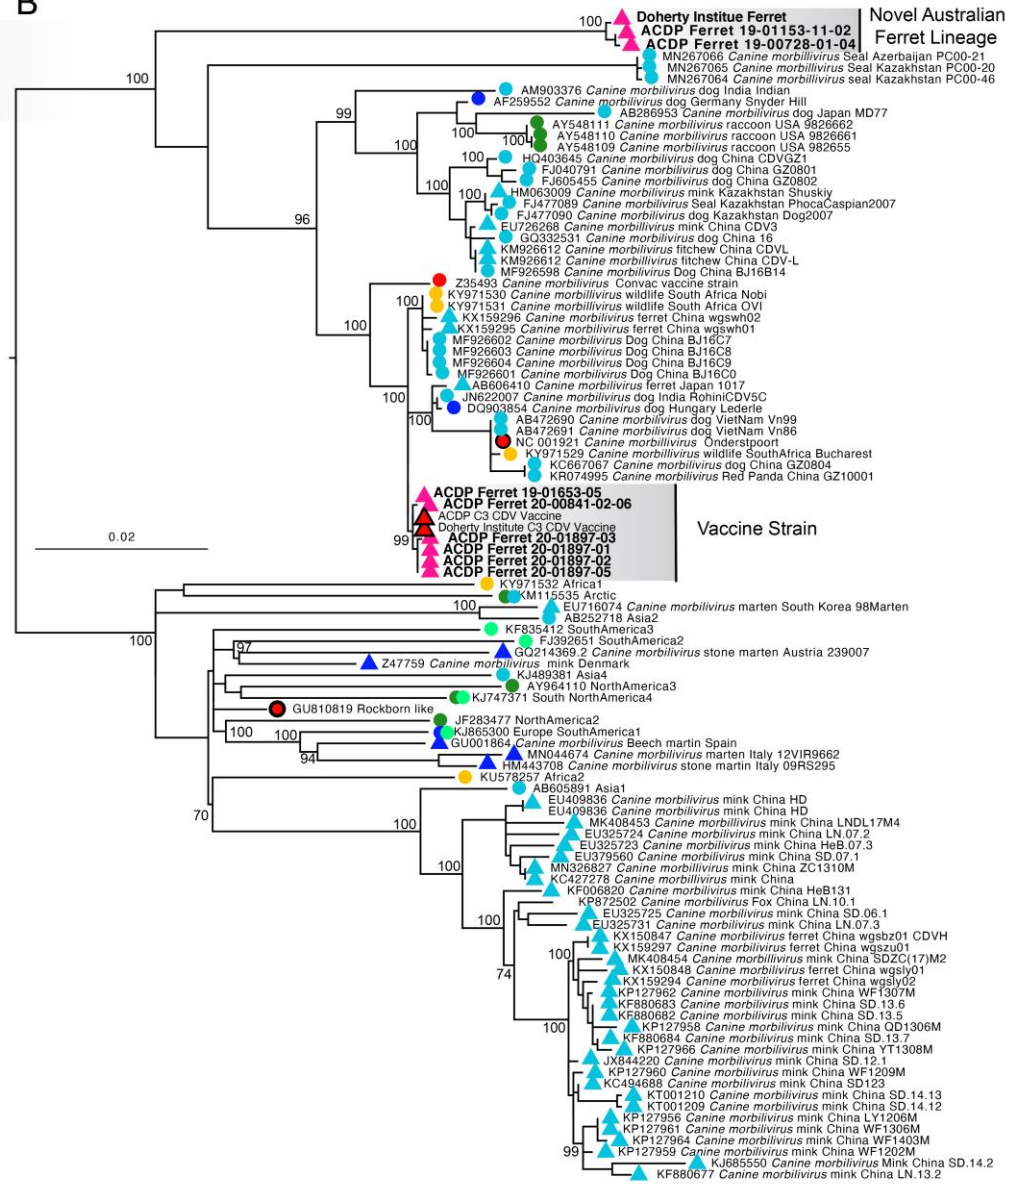

847 **Figure 4. Phylogenetic analysis of the H gene of CDV.** (A) Tree containing H gene of all CDV sequences available in GenBank. Tips  
848 are coloured by geographic region. Red shapes with a thick black border corresponds to a vaccine strain. Shapes indicate host, with all  
849 mustelid hosts indicated by a triangle. (B) Expansion of the “Vaccine/Asia-3/North America-1” lineage which is indicated by a grey box in  
850 A, in addition to reference sequences for main lineages and all sequences from mustelids. Sequences generated in this study are  
851 presented in a grey and sequences from ferrets are in bold text. Both the Doherty Institute and ACDP generated a full genome of the  
852 Protech Vaccine Strain, indicated by a red triangle in the “Vaccine strain” clade. Scale bar indicates the number of substitutions per site.  
853 Support values are presented for major nodes.

854



860

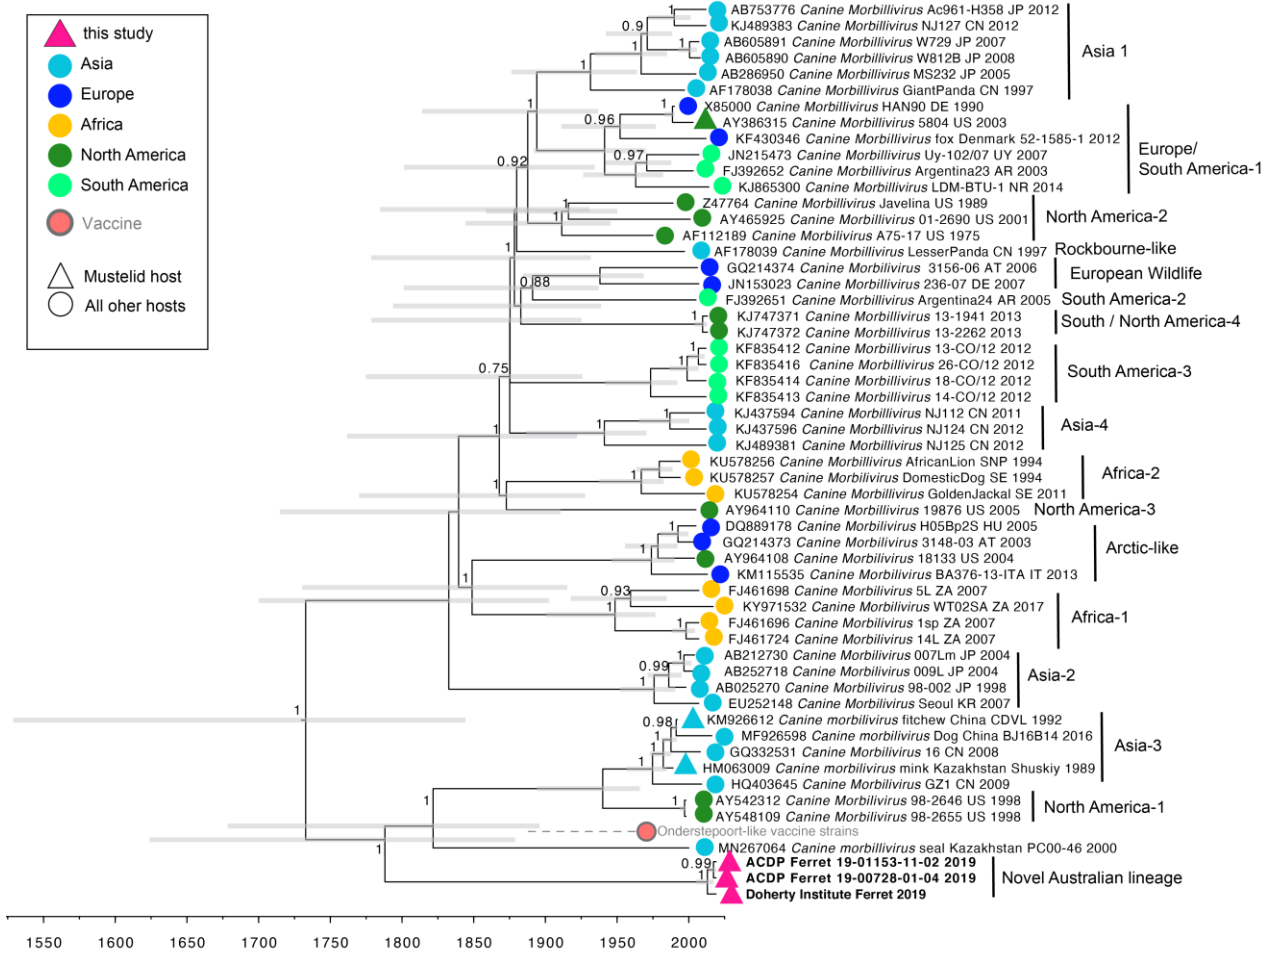

861

862 **Figure 6. Time structured phylogeny of the H gene.** Reference sequences are those presented  
 863 in Duque-Valencia et al (2019). We did not include any vaccine strains, including the vaccine  
 864 strains from ferrets sequenced in this study because repeated passage of vaccine strains in  
 865 laboratory settings does not reflect natural evolution. However we have included the tentative  
 866 position of the vaccine clade for clarity only – the outgroup to Asia-3 and North America-1. This  
 867 phylogenetic position is based upon maximum likelihood estimation in this study and Duque-  
 868 Valencia et al (2019). Field strain sequences generated in this study are in bold. Scale bar  
 869 represents time in years. Node labels correspond to posterior probabilities of each node. Grey bars  
 870 comprise the 95% highest posterior density of the date estimate.

871



872 Table 1. Primers and probes used at the Doherty Institute and ACDP for the detection of CDV in ferrets

| Primer <sup>1</sup> | Sequences (5'-3')                               | Primer Position <sup>2</sup> | Purpose               | Institute | Reference         |
|---------------------|-------------------------------------------------|------------------------------|-----------------------|-----------|-------------------|
| p1                  | ACAGGATTGCTGAGGACCTAT                           | 769-789 <sup>3</sup>         | Real Time RT-PCR      | Doherty   | Frisk et al. (53) |
| p2                  | CAAGATAACCATGTACGGTGC                           | 1055-1035 <sup>3</sup>       | Real Time RT-PCR      | Doherty   | Frisk et al. (53) |
| CDV probe           | FAM-<br>ACCCAAGAGCCGGATACATAGTTTCAATGC<br>-BHQ2 | 961-934                      | Real Time RT-PCR      | Doherty   | Han et al. (54)   |
| d/CDV F             | GCTATATCAACAGATGGGTG                            | 934-953                      | Discriminative RT-PCR | Doherty   | This study        |
| d/CDV R             | CATGGAGTTCTCAAGTTCAAC                           | 1149-1129                    | Discriminative RT-PCR | Doherty   | This study        |
| d/WT probe          | FAM-GTCATTCTAGAAAATTCTG-MGB NFQ                 | 1047-1065                    | Discriminative RT-PCR | Doherty   | This study        |
| d/Vax probe         | VIC-GTTATCTTGAAAACCTCTG-MGB NFQ                 | 1047-1065                    | Discriminative RT-PCR | Doherty   | This study        |
| p5                  | CAAAGACGTGTGGTCCGAGAA                           | 711-731 <sup>3</sup>         | Sanger sequencing     | Doherty   | Frisk et al. (53) |
| p6                  | CTTAGTAAGCATCCTCATCTTGCC                        | 1610-1587 <sup>3</sup>       | Sanger sequencing     | Doherty   | Frisk et al. (53) |

|            |                                            |           |                               |         |                     |
|------------|--------------------------------------------|-----------|-------------------------------|---------|---------------------|
| NP M13 F   | TGTA AACGACGGCCAGTACCAGACAAAG<br>TTGGCTAWG | 1-20      | Sanger sequencing             | Doherty | This study          |
| NP M13 R   | CAGGAAACAGCTATGACCATGATGTCAGC<br>AATTCTAGG | 868-849   | Sanger sequencing             | Doherty | This study          |
| NP II F    | CTTGGACATCAAACGATCC                        | 818-836   | Sanger sequencing             | Doherty | This study          |
| NP II R    | TTGGACCTGGGTCCTAAG                         | 1756-1739 | Sanger sequencing             | Doherty | This study          |
| CDV H DP1  | GCAACACCTGTGGATCAAGT                       | 8051-8070 | Sanger sequencing             | Doherty | Wang et al.<br>(55) |
| CDV H DP2  | ATTGGCGACACCACAAATCG                       | 8810-8791 | Sanger sequencing             | Doherty | Wang et al.<br>(55) |
| H I F      | TTAGGGCTCAGGTAGT                           | 7057-7072 | Sanger sequencing             | Doherty | This study          |
| H I R      | GAATACCGTCTTG YGAAC                        | 8024-8007 | Sanger sequencing             | Doherty | This study          |
| H II F     | GCTTCCTTGTGTGTAG                           | 7955-7970 | Sanger sequencing             | Doherty | This study          |
| H II R     | GTATCATCATACTGTCAAG                        | 8916-8898 | Sanger sequencing             | Doherty | This study          |
| F II F     | CAATTTGGAGAGTCGGGGGAT                      | 6044-6064 | Sanger sequencing             | Doherty | This study          |
| F II R     | GAACGCTGAGAGACTGCCAA                       | 6770-6751 | Sanger sequencing             | Doherty | This study          |
| F III F    | TTGGCAGTCTCTCAGGCTTC                       | 6751-6770 | Sanger sequencing             | Doherty | This study          |
| F III R    | AGTTTTGTGGCAACCGTAACC                      | 7409-7389 | Sanger sequencing             | Doherty | This study          |
| NGS CDV F1 | ACCAGACAAAGTTGGCTAAG                       | 1-20      | Next-generation<br>sequencing | Doherty | This study          |
| NGS CDV R1 | CTCGAATCTGTAAAATTGGTGAC                    | 8824-8802 | Next-generation<br>sequencing | Doherty | This study          |

|            |                        |             |                            |         |                   |
|------------|------------------------|-------------|----------------------------|---------|-------------------|
| NGS CDV F2 | CCAGGGAATCAAGTGGAAATTG | 8526-8547   | Next-generation sequencing | Doherty | This study        |
| NGS CDV R2 | ACCAGACAAGCTGGGTATG    | 15690-15671 | Next-generation sequencing | Doherty | This study        |
| Barret F   | ATGTTTATGATCACAGCGGT   | 2132-2151   | Real Time RT-PCR           | ACDP    | Barret et al (25) |
| Barret R   | ATTGGGTTGCACCACTTGTC   | 2561-2542   | Real Time RT-PCR           | ACDP    | Barret et al (25) |

873 <sup>1</sup> Primer names denote gene name, gene segment, tag if applicable and F and R for forward and reverse respectively, unless otherwise  
874 indicated.

875 <sup>2</sup> Nucleotide position aligned to Onderstepoort strain unless otherwise stated.

876 <sup>3</sup> Nucleotide position according to Frisk et al.(53)

877 **Table 2. Number of ferrets infected with CDV in the Doherty Institute**

| Ferrets           | qPCR<br>Positive <sup>1</sup> | Positive for field<br>strain <sup>2</sup> | Positive for<br>Vaccine strain <sup>2</sup> | Negative CDV<br>result <sup>1</sup> |
|-------------------|-------------------------------|-------------------------------------------|---------------------------------------------|-------------------------------------|
| <b>Tested</b>     | 115                           | 41                                        | 65                                          | 64                                  |
| <b>Euthanised</b> | 6                             | 3                                         | 3                                           | 1                                   |

878 1. Based on either the qPCR assay from relevant literature (53, 54) and/or the  
879 commercial Canine Distemper Virus Detection qPCR

880 2. Based on the discriminatory PCR developed in this study
